# Supplementary material for: Using SAR satellite data time-series for regional glacier mapping
Source: Copernicus journal article supplement (doi:10.5194/tc-2017-136), 2017-08-07
Supplement: Supplementary file 1 [file tc-2017-136-supplement.zip]

Archive with 3 entries (3 files):
- TCD_Supplement_Winsvold_tc-2017-136/ReadMe_TCD_Supplement_Winsvold_tc-2017-136.pdf
- TCD_Supplement_Winsvold_tc-2017-136/TCD_Supl_Animation_HELL_Winsvold_tc-2017-136.avi
- TCD_Supplement_Winsvold_tc-2017-136/TCD_Supl_Animation_KNG_Winsvold_tc-2017-136.avi
