# Supplementary material for: Using SAR satellite data time-series for regional glacier mapping
Source: Copernicus journal article supplement (doi:10.5194/tc-2017-136), 2017-08-07
Supplement: Supplementary file 1 [file tc-2017-136-supplement.zip › TCD_Supplement_Winsvold_tc-2017-136/ReadMe_TCD_Supplement_Winsvold_tc-2017-136.pdf]

Supplementary material to the paper submitted to TCD:

## **Using SAR satellite data time series for regional glacier mapping**

Solveig H. Winsvold<sup>1</sup>, Andreas Kääb<sup>1</sup>, Christopher Nuth<sup>1</sup>, Liss M. Andreassen<sup>2</sup>, Ward van Pelt<sup>3</sup>, and Thomas Schellenberger<sup>1</sup>

<sup>1</sup> Department of Geosciences, University of Oslo, P.O. Box 1047 Blindern, 0316 Oslo, Norway

<sup>2</sup> Section for Glaciers, Ice and Snow, Hydrology Department, Norwegian Water Resources and Energy Directorate, P.O. Box 5091 Majorstua, 0301 Oslo, Norway

<sup>3</sup> Department of Earth Sciences, Uppsala University, Villav. 16, 752 36 Uppsala, Sweden

The supplements consist of two animations of Sentinel-1 backscatter time-series over glaciers:

- 1) TCD\_Supl\_Animation\_KNG\_Winsvold\_tc-2017-136.avi
  - a. Sentinel-1 backscatter time-series images from 2015 to 2016 over Kongsvegen, Svalbard. The heatplot shows backscatter values (sigma 0) plotted along a centerline with a spacing of 300 m (y-axis) up-glacier in time. White regions in the heatplot represent missing Sentinel-1 acquisitions.
- 2) TCD\_Supl\_Animation\_HELL\_Winsvold\_tc-2017-136.avi
  - a. Sentinel-1 backscatter time-series images from 2014 to 2016 over Hellstugubreen, Norway. The heatplot shows backscatter values (sigma 0) plotted along a centerline with a spacing of 100 m (y-axis) up-glacier in time. White regions in the heatplot represent missing Sentinel-1 acquisitions.
